# Supplementary material for: Environmental Impact of Meals: How Big Is the Carbon Footprint in the School Canteens?
Source: MDPI journal article supplement (doi:10.3390/foods11020193), 2022-01-12
Supplement: s1 [file s1]

**Table S1** – Carbon footprint (CF), energy content and Carbon-Footprint/Energy index (CFE index) of the food items.

| <b>Meat and fish</b> | <b>CF [g CO<sub>2</sub>/g]</b> | <b>Source of CF<sup>1</sup></b> | <b>Energy content<sup>2</sup> [kJ/g]</b> | <b>CFE index [g CO<sub>2</sub>/kJ]</b> |
|----------------------|--------------------------------|---------------------------------|------------------------------------------|----------------------------------------|
| Beef                 | 22.80                          | Epd COOP, 2016                  | 5.48                                     | 4.16                                   |
| Beef (hamburger)     | 10.20                          | Epd INALCA, 2018                | 11.03                                    | 0.92                                   |
| Blue shark           | 3.37                           | Iribarren et al., 2011          | 4.40                                     | 0.77                                   |
| Chicken              | 3.65                           | Clune et al., 2017              | 7.17                                     | 0.51                                   |
| Codfish              | 3.51                           | Clune et al., 2017              | 2.96                                     | 1.19                                   |
| Cuttlefish           | 7.13                           | Clune et al., 2017              | 3.02                                     | 2.36                                   |
| Fish (generic)       | 4.41                           | Clune et al., 2017              | 4.40                                     | 1.00                                   |
| Mackerel             | 1.80                           | Clune et al., 2017              | 7.10                                     | 0.25                                   |
| Mussels              | 9.51                           | Clune et al., 2017              | 3.51                                     | 2.71                                   |
| Octopus              | 7.13                           | Clune et al., 2017              | 2.37                                     | 3.01                                   |
| Pilchard             | 1.10                           | Clune et al., 2017              | 9.43                                     | 0.12                                   |
| Pork (generic)       | 5.77                           | Clune et al., 2017              | 8.58                                     | 0.67                                   |
| Pork (ham)           | 4.25                           | Bava et al., 2017               | 9.36                                     | 0.45                                   |
| Pork (minced meat)   | 4.22                           | LCA food dk (database)          | 10.80                                    | 0.39                                   |
| Pork (tenderloin)    | 4.17                           | LCA food dk (database)          | 6.58                                     | 0.63                                   |
| Pork (sausages)      | 4.22                           | LCA food dk (database)          | 12.73                                    | 0.33                                   |
| Pork (bacon)         | 4.23                           | LCA food dk (database)          | 22.19                                    | 0.19                                   |
| Shrimps              | 7.80                           | Clune et al., 2017              | 2.96                                     | 2.64                                   |
| Squid                | 7.13                           | Clune et al., 2017              | 2.84                                     | 2.51                                   |
| Tuna                 | 2.15                           | Clune et al., 2017              | 6.66                                     | 0.32                                   |
| Tuna (yellowfin)     | 20.45                          | Iribarren et al., 2011          | 6.66                                     | 3.07                                   |
| Turkey               | 7.17                           | Clune et al., 2017              | 5.64                                     | 1.27                                   |
| Veal                 | 24.10                          | Epd COOP, 2016                  | 4.48                                     | 5.38                                   |

| <b>Dairy, eggs, subs.</b> | <b>CF [g CO<sub>2</sub>/g]</b> | <b>Source of CF<sup>1</sup></b> | <b>Energy content<sup>2</sup> [kJ/g]</b> | <b>CFE index [g CO<sub>2</sub>/kJ]</b> |
|---------------------------|--------------------------------|---------------------------------|------------------------------------------|----------------------------------------|
| Butter                    | 9.25                           | Clune et al., 2017              | 31.71                                    | 0.29                                   |
| Coconut milk              | 0.42                           | Clune et al., 2017              | 14.97                                    | 0.03                                   |
| Cream                     | 5.90                           | Epd Granarolo, 2018             | 9.74                                     | 0.61                                   |
| Eggs                      | 3.20                           | Epd Granarolo, 2019             | 5.35                                     | 0.60                                   |
| Gorgonzola                | 10.70                          | Bava et al., 2017a              | 13.56                                    | 0.79                                   |
| Mascarpone                | 7.11                           | Epd Granarolo, 2016             | 19.02                                    | 0.37                                   |
| Milk                      | 1.8                            | Epd Granarolo, 2017             | 2.65                                     | 0.68                                   |
| Mozzarella                | 8.70                           | Epd Granarolo, 2019             | 10.58                                    | 0.82                                   |
| Parmigiano                | 16.90                          | Bava et al., 2017a              | 16.61                                    | 1.02                                   |
| Pecorino Romano           | 16.90                          | Vagnoni et al., 2017            | 17.10                                    | 0.99                                   |
| Pecorino Sardo            | 17.10                          | Vagnoni et al., 2017            | 16.90                                    | 1.01                                   |
| Rice milk                 | 0.66                           | Epd OraSi, 2019                 | 2.22                                     | 0.30                                   |
| Ricotta                   | 3.33                           | Epd Granarolo, 2016             | 6.58                                     | 0.51                                   |
| Soy milk                  | 0.69                           | Epd OraSi, 2019                 | 1.33                                     | 0.52                                   |
| Stracchino                | 5.08                           | Epd Granarolo, 2016             | 12.55                                    | 0.40                                   |
| Yogurt                    | 2.73                           | Epd Granarolo, 2018             | 2.78                                     | 0.98                                   |

| <b>Vegetables</b> | <b>CF [g CO<sub>2</sub>/g]</b> | <b>Source of CF<sup>1</sup></b> | <b>Energy content<sup>2</sup> [kJ/g]</b> | <b>CFE index [g CO<sub>2</sub>/kJ]</b> |
|-------------------|--------------------------------|---------------------------------|------------------------------------------|----------------------------------------|
| Artichokes        | 0.48                           | Clune et al., 2017              | 1.38                                     | 0.35                                   |
| Aubergines        | 1.35                           | Clune et al., 2017              | 0.94                                     | 1.44                                   |
| Beans             | 0.43                           | Clune et al., 2017              | 13.62                                    | 0.03                                   |
| Beans (borlotti)  | 1.06                           | Epd Valfrutta, 2019             | 4.26                                     | 0.25                                   |
| Cowpeas           | 0.49                           | Clune et al., 2017              | 13.32                                    | 0.04                                   |
| Broccoli          | 0.60                           | Clune et al., 2017              | 1.40                                     | 0.43                                   |
| Cabbage           | 0.23                           | Clune et al., 2017              | 1.00                                     | 0.23                                   |

|                      |      |                          |       |      |
|----------------------|------|--------------------------|-------|------|
| Carrots              | 0.20 | Clune et al., 2017       | 1.71  | 0.12 |
| Cauliflower          | 0.36 | Clune et al., 2017       | 1.24  | 0.29 |
| Celery               | 0.18 | Clune et al., 2017       | 0.97  | 0.19 |
| Chard                | 0.10 | Adeyale et al., 2016     | 1.03  | 0.10 |
| Chickpeas            | 0.77 | Clune et al., 2017       | 4.65  | 0.17 |
| Cucumber             | 0.23 | Clune et al., 2017       | 0.65  | 0.35 |
| Fava beans           | 0.56 | Ecoinvent 3.5 (database) | 2.15  | 0.26 |
| Fennel               | 0.48 | Clune et al., 2017       | 0.62  | 0.77 |
| Garlic               | 0.57 | Clune et al., 2017       | 2.22  | 0.26 |
| Green beans          | 0.31 | Clune et al., 2017       | 1.01  | 0.31 |
| Leek                 | 0.09 | de Backer et al., 2009   | 1.45  | 0.07 |
| Legumes (generic)    | 0.51 | Clune et al., 2017       | 13.56 | 0.04 |
| Lentils              | 1.03 | Clune et al., 2017       | 13.35 | 0.08 |
| Lettuce              | 0.37 | Clune et al., 2017       | 0.92  | 0.40 |
| Mushrooms            | 0.27 | Clune et al., 2017       | 1.28  | 0.21 |
| Olives               | 0.63 | Clune et al., 2017       | 10.17 | 0.06 |
| Onion                | 0.17 | Clune et al., 2017       | 1.18  | 0.14 |
| Peas                 | 0.38 | Clune et al., 2017       | 3.28  | 0.12 |
| Pepper               | 0.66 | Clune et al., 2017       | 1.08  | 0.61 |
| Potatoes             | 0.25 | Epd Selenella, 2019      | 3.03  | 0.08 |
| Pumpkin              | 0.25 | Clune et al., 2017       | 1.23  | 0.20 |
| Savoy cabbage        | 0.23 | Clune et al., 2017       | 1.21  | 0.19 |
| Soybean              | 0.49 | Clune et al., 2017       | 18.00 | 0.03 |
| Spinach              | 0.54 | Clune et al., 2017       | 1.45  | 0.37 |
| Sweetcorn            | 0.47 | Clune et al., 2017       | 4.39  | 0.11 |
| Tofu                 | 0.49 | Clune et al., 2017       | 3.27  | 0.15 |
| Tomatoes             | 0.45 | Clune et al., 2017       | 0.80  | 0.56 |
| Vegetables (generic) | 0.37 | Clune et al., 2017       | 0.96  | 0.38 |
| Zucchini             | 0.21 | Clune et al., 2017       | 0.66  | 0.32 |

| Cereals and pasta       | CF [g CO <sub>2</sub> /g] | Source of CF <sup>1</sup>  | Energy content <sup>2</sup> [kJ/g] | CFE index [g CO <sub>2</sub> /kJ] |
|-------------------------|---------------------------|----------------------------|------------------------------------|-----------------------------------|
| Barley                  | 0.43                      | Clune et al., 2017         | 14.47                              | 0.03                              |
| Bread (sliced)          | 1.03                      | Epd Barilla, 2020          | 11.20                              | 0.09                              |
| Breadcrumbs             | 1.03                      | Epd Barilla, 2020          | 14.96                              | 0.07                              |
| Burghul                 | 0.52                      | Clune et al., 2017         | 12.77                              | 0.04                              |
| Corn flour              | 0.93                      | Agri-foot print (database) | 14.26                              | 0.07                              |
| Cous cous               | 0.52                      | Clune et al., 2017         | 15.09                              | 0.03                              |
| Croutons                | 1.44                      | Epd Barilla, 2019          | 11.52                              | 0.12                              |
| Quinoa                  | 1.15                      | Clune et al., 2017         | 15.72                              | 0.07                              |
| Rice                    | 2.55                      | Clune et al., 2017         | 14.15                              | 0.18                              |
| Seitan                  | 0.51                      | Clune et al., 2017         | 15.49                              | 0.03                              |
| Semolina pasta          | 0.82                      | Epd Barilla, 2019          | 14.26                              | 0.06                              |
| Tagliatelle (egg pasta) | 2.46                      | Epd De Cecco, 2017         | 14.49                              | 0.17                              |
| Wheat                   | 0.52                      | Clune et al., 2017         | 13.76                              | 0.04                              |
| Wheat flour             | 0.31                      | Epd Molino Grassi, 2018    | 13.52                              | 0.02                              |

| Fruits      | CF [g CO <sub>2</sub> /g] | Source of CF <sup>1</sup> | Energy content <sup>2</sup> [kJ/g] | CFE index [g CO <sub>2</sub> /kJ] |
|-------------|---------------------------|---------------------------|------------------------------------|-----------------------------------|
| Almonds     | 1.54                      | Clune et al., 2017        | 26.29                              | 0.06                              |
| Apples      | 0.15                      | Epd Assomela, 2019        | 1.82                               | 0.08                              |
| Apricot     | 0.43                      | Clune et al., 2017        | 1.77                               | 0.24                              |
| Banana      | 0.72                      | Clune et al., 2017        | 3.19                               | 0.23                              |
| Blueberries | 0.92                      | Clune et al., 2017        | 2.07                               | 0.44                              |
| Cashew nut  | 1.44                      | Clune et al., 2017        | 25.26                              | 0.06                              |
| Cherries    | 0.39                      | Clune et al., 2017        | 2.01                               | 0.19                              |
| Chestnut    | 0.43                      | Clune et al., 2017        | 7.28                               | 0.06                              |
| Figs        | 0.43                      | Clune et al., 2017        | 2.62                               | 0.16                              |
| Hazelnuts   | 0.97                      | Clune et al., 2017        | 28.08                              | 0.03                              |

|              |      |                      |       |      |
|--------------|------|----------------------|-------|------|
| Kiwi         | 0.36 | Clune et al., 2017   | 2.02  | 0.18 |
| Lemon juice  | 0.70 | Beccali et al., 2009 | 0.43  | 1.63 |
| Melon        | 0.30 | Clune et al., 2017   | 1.43  | 0.21 |
| Oranges      | 0.33 | Clune et al., 2017   | 1.55  | 0.21 |
| Peaches      | 0.43 | Clune et al., 2017   | 1.19  | 0.36 |
| Peanut       | 0.83 | Clune et al., 2017   | 25.93 | 0.03 |
| Pears        | 0.31 | Clune et al., 2017   | 2.16  | 0.14 |
| Raspberries  | 0.84 | Clune et al., 2017   | 2.03  | 0.41 |
| Strawberries | 0.58 | Clune et al., 2017   | 1.27  | 0.46 |
| Watermelon   | 0.32 | Clune et al., 2017   | 0.67  | 0.48 |
| White wine   | 0.76 | Fusi et al., 2014    | 2.93  | 0.26 |

| <b>Oil, spices, sauces</b> | <b>CF [g CO<sub>2</sub>/g]</b> | <b>Source of CF<sup>1</sup></b> | <b>Energy content<sup>2</sup> [kJ/g]</b> | <b>CFE index [g CO<sub>2</sub>/kJ]</b> |
|----------------------------|--------------------------------|---------------------------------|------------------------------------------|----------------------------------------|
| Mustard                    | 2.09                           | Clune et al., 2017              | 24.28                                    | 0.09                                   |
| Olive oil                  | 4.14                           | Epd Monini, 2019                | 37.62                                    | 0.11                                   |
| Peanuts oil                | 4.72                           | Schmidt, 2015                   | 37.62                                    | 0.13                                   |
| Pesto sauce                | 2.72                           | Epd Barilla, 2019               | 10.44                                    | 0.26                                   |
| Ragù sauce                 | 4.41                           | Epd, 2015                       | 8.18                                     | 0.54                                   |
| Saffron                    | 3205.13                        | Khanali et al., 2016            | 13.77                                    | 232.73                                 |
| Tomato sauce               | 1.14                           | Epd Valfrutta, 2019             | 0.89                                     | 1.28                                   |

<sup>1</sup> Epd source: (The International EPD® System, 2020)

<sup>2</sup> Data come from: Ministero delle politiche agricole, alimentari e forestali (CREA, 2019).

**Table S2** – Total amount of ingredients (divided by course and category) used in the menus.

| <b>Food category</b>   | <b>Unit</b> | <b>Winter menu</b>  |                      |                  | <b>Summer menu</b>  |                      |                  |
|------------------------|-------------|---------------------|----------------------|------------------|---------------------|----------------------|------------------|
|                        |             | <i>First course</i> | <i>Second course</i> | <i>Side dish</i> | <i>First course</i> | <i>Second course</i> | <i>Side dish</i> |
| Meat and fish          | g           | 170                 | 1650                 | 0                | 120                 | 1460                 | 0                |
| Dairy, eggs and subs.  | g           | 165                 | 491                  | 0                | 135                 | 443                  | 11               |
| Vegetables             | g           | 1065                | 560                  | 2880             | 435                 | 1465                 | 2710             |
| Fruits                 | g           | 0                   | 0                    | 0                | 0                   | 300                  | 0                |
| Cereals and pasta      | g           | 1465                | 80                   | 0                | 1600                | 30                   | 30               |
| Oil, spices and sauces | g           | 920                 | 200                  | 132              | 974                 | 346                  | 90               |

**Table S3** – Recipes from the school canteen meals.

| <b>FIRST COURSE</b>                         | <b>g</b> | <b>SECOND COURSE</b>                       | <b>g</b> | <b>SIDE DISH</b>                          | <b>g</b> |
|---------------------------------------------|----------|--------------------------------------------|----------|-------------------------------------------|----------|
| <b><u>Barley soup</u></b>                   |          | <b><u>Aubergines roll</u></b>              |          | <b><u>Backed/steam potatoes</u></b>       |          |
| Pearl barley                                | 40       | Aubergines                                 | 150      | Potatoes                                  | 230      |
| Potatoes                                    | 100      | Ham                                        | 80       | Olive oil                                 | 6        |
| Olive oil                                   | 6        | Tomato sauce                               | 70       |                                           |          |
|                                             |          | Olive oil                                  | 6        | <b><u>Carrots</u></b>                     |          |
| <b><u>Gnocchi with tomato sauce</u></b>     |          |                                            |          | Carrots                                   | 120      |
| Gnocchi: potatoes                           | 250      | <b><u>Backed chicken thighs</u></b>        |          | Olive oil                                 | 6        |
| Gnocchi: wheat flour                        | 75       | Chicken thighs                             | 180      |                                           |          |
| Tomato sauce                                | 70       | Olive oil                                  | 6        | <b><u>Crudities with oil</u></b>          |          |
| Onion                                       | 5        | <b><u>Beef escalope</u></b>                |          | Fennels                                   | 100      |
| Olive oil                                   | 6        | Beef                                       | 120      | Carrots                                   | 100      |
| <b><u>Lasagne</u></b>                       |          | Wheat flour                                | 10       | Olive oil                                 | 6        |
| Egg pasta                                   | 60       | Olive oil                                  | 6        | <b><u>Green beans</u></b>                 |          |
| Tomato sauce                                | 70       |                                            |          | Green beans                               | 150      |
| Beef meat                                   | 35       | <b><u>Blue shark with tomato sauce</u></b> |          | Olive oil                                 | 6        |
|                                             |          | Blue shark                                 | 120      |                                           |          |
| Bechamel: milk                              | 50       | Tomato sauce                               | 30       | <b><u>Mixed cooked vegetables</u></b>     |          |
| Bechamel: wheat flour                       | 50       | Olive oil                                  | 6        | Spinach                                   | 30       |
| Olive oil                                   | 6        |                                            |          | Pumpkin                                   | 30       |
| Grated Parmigiano                           | 5        | <b><u>Boiled egg</u></b>                   |          | Onion                                     | 30       |
| <b><u>Pasta salad</u></b>                   |          | Boiled egg                                 | 70       | Fennel                                    | 30       |
| Semolina pasta                              | 80       | <b><u>Caprese salad</u></b>                |          | Broccoli                                  | 30       |
| Tomatoes                                    | 20       | Tomatoes                                   | 100      | Olive oil                                 | 6        |
| Aubergines                                  | 20       | Mozzarella                                 | 90       |                                           |          |
| Mozzarella                                  | 10       | Olive oil                                  | 6        | <b><u>Mixed raw vegetables</u></b>        |          |
| Olive oil                                   | 6        |                                            |          | Sweetcorn                                 | 50       |
| <b><u>Pasta with aubergines</u></b>         |          | <b><u>Chicken breast</u></b>               |          | Cucumber                                  | 50       |
| Semolina pasta                              | 80       | Chicken breast                             | 120      | Fennel                                    | 50       |
| Aubergines                                  | 50       |                                            |          | Carrots                                   | 50       |
| Olive oil                                   | 6        | <b><u>Chicken escalope</u></b>             |          | Olive oil                                 | 6        |
| <b><u>Pasta with oil and Parmigiano</u></b> |          | Chicken breast                             | 120      | <b><u>Mixed salad</u></b>                 |          |
| Semolina pasta                              | 80       | Wheat flour                                | 10       | Salad                                     | 50       |
| Olive oil                                   | 6        | Olive oil                                  | 6        | Tomatoes                                  | 100      |
| Grated Parmigiano                           | 6        | <b><u>Chicken salad</u></b>                |          | Sweetcorn                                 | 50       |
| <b><u>Pasta with peas</u></b>               |          | Salad                                      | 50       | Olive oil                                 | 6        |
| Semolina pasta                              | 80       | Chicken breast                             | 100      | <b><u>Peas</u></b>                        |          |
| Tomato sauce                                | 70       | Olives                                     | 30       | Peas                                      | 70       |
| Peas                                        | 50       | Tomatoes                                   | 100      | Olive oil                                 | 6        |
| Olive oil                                   | 6        | Sweetcorn                                  | 50       |                                           |          |
|                                             |          | Olive oil                                  | 6        | <b><u>Peas with butter Parmigiano</u></b> |          |
| <b><u>Pasta with pesto sauce</u></b>        |          | <b><u>Codfish with lemon</u></b>           |          | Peas                                      | 70       |
| Semolina pasta                              | 80       | Codfish                                    | 170      | Butter                                    | 5        |
| Pesto sauce (ready to eat)                  | 70       | Lemon juice                                | 5        | Grated Parmigiano                         | 6        |
| <b><u>Pasta with ragù sauce</u></b>         |          | <b><u>Codfish with tomato sauce</u></b>    |          | <b><u>Stew cabbage</u></b>                |          |
|                                             |          |                                            |          | Savoy cabbage                             | 100      |

|                |    |
|----------------|----|
| Semolina pasta | 80 |
| Tomato sauce   | 70 |
| Beef meat      | 35 |
| Olive oil      | 6  |

**Pasta with tomato sauce**

|                |    |
|----------------|----|
| Semolina pasta | 80 |
| Tomato sauce   | 70 |
| Onion          | 5  |
| Olive oil      | 6  |

**Pasta with tomato sauce and olives**

|                |    |
|----------------|----|
| Semolina pasta | 80 |
| Tomato sauce   | 70 |
| Olives         | 30 |
| Olive oil      | 6  |

**Pasta with tuna**

|                |    |
|----------------|----|
| Semolina pasta | 80 |
| Tomato sauce   | 70 |
| Tuna           | 30 |
| Olive oil      | 6  |

**Pasta with vegetables**

|                  |    |
|------------------|----|
| Semolina pasta   | 80 |
| Tomato sauce     | 70 |
| Mixed vegetables | 50 |
| Olive oil        | 6  |

**Pasta with ragù and vegetables**

|                  |    |
|------------------|----|
| Semolina pasta   | 80 |
| Tomato sauce     | 70 |
| Beef meat        | 35 |
| Mixed vegetables | 50 |
| Olive oil        | 6  |

**Pasta with zucchini**

|                |    |
|----------------|----|
| Semolina pasta | 80 |
| Zucchini       | 50 |
| Olive oil      | 6  |

**Pizza Margherita**

|              |     |
|--------------|-----|
| Wheat flour  | 120 |
| Olive oil    | 10  |
| Tomato sauce | 80  |
| Mozzarella   | 60  |

**Polenta with ragù sauce**

|                     |    |
|---------------------|----|
| Polenta: corn flour | 80 |
| Polenta: olive oil  | 6  |
| Tomato sauce        | 70 |
| Beef meat           | 35 |

**Rice salad**

|      |    |
|------|----|
| Rice | 70 |
|------|----|

|              |     |
|--------------|-----|
| Codfish      | 120 |
| Tomato sauce | 30  |
| Olive oil    | 6   |

**Crud cheese (one of this)**

|            |     |
|------------|-----|
| Mozzarella | 90  |
| Ricotta    | 100 |
| Stracchino | 90  |

**Fish croquettes**

|         |    |
|---------|----|
| Codfish | 80 |
| Spinach | 80 |

|           |    |
|-----------|----|
| Potatoes  | 80 |
| Eggs      | 15 |
| Olive oil | 6  |

**Fish cutlet**

|            |     |
|------------|-----|
| Blue shark | 100 |
| Eggs       | 15  |
| Olive oil  | 6   |

**Hamburger meat pizzaiola**

|                |     |
|----------------|-----|
| Beef hamburger | 120 |
| Tomato sauce   | 50  |
| Mozzarella     | 10  |
| Olive oil      | 6   |

**Hamburger sandwich**

|                |     |
|----------------|-----|
| Bread          | 60  |
| Beef hamburger | 100 |

**Mackerel with lemon**

|             |     |
|-------------|-----|
| Mackerel    | 170 |
| Lemon juice | 5   |

**Meat skewers**

|           |    |
|-----------|----|
| Sausages  | 60 |
| Chicken   | 60 |
| Olive oil | 6  |

**Meatballs**

|                   |    |
|-------------------|----|
| Beef              | 80 |
| Tomato sauce      | 40 |
| Breadcrumbs       | 20 |
| Grated Parmigiano | 6  |
| Olive oil         | 6  |

**Milk turkey stew**

|        |     |
|--------|-----|
| Turkey | 120 |
| Milk   | 50  |
| Butter | 5   |

**Omelette**

|           |    |
|-----------|----|
| Eggs      | 70 |
| Olive oil | 6  |

|              |    |
|--------------|----|
| Tomato sauce | 30 |
|--------------|----|

**Tomatoes gratin**

|             |     |
|-------------|-----|
| Tomatoes    | 150 |
| Breadcrumbs | 30  |
| Olive oil   | 6   |

|                 |    |
|-----------------|----|
| Tomatoes        | 30 |
| Olives          | 20 |
| Pecorino Romano | 20 |
| Backed ham      | 20 |
| Peas            | 20 |
| Sweetcorn       | 20 |

#### **Rice with tomato sauce**

|                   |    |
|-------------------|----|
| Rice              | 70 |
| Tomato sauce      | 50 |
| Grated Parmigiano | 6  |
| Butter            | 5  |

#### **Rice with tomato sauce and vegetables**

|                   |    |
|-------------------|----|
| Rice              | 70 |
| Mixed vegetables  | 50 |
| Tomato sauce      | 50 |
| Grated Parmigiano | 6  |
| Butter            | 5  |

#### **Risotto Milanese**

|                   |      |
|-------------------|------|
| Rice              | 70   |
| Onion             | 5    |
| Grated Parmigiano | 6    |
| Butter            | 5    |
| Olive oil         | 6    |
| Saffron           | 0,05 |

#### **Risotto Parmigiana**

|                   |    |
|-------------------|----|
| Rice              | 70 |
| Onion             | 5  |
| Grated Parmigiano | 6  |
| Butter            | 5  |

#### **Risotto with artichokes**

|                   |    |
|-------------------|----|
| Rice              | 70 |
| Artichokes        | 30 |
| Onion             | 5  |
| Grated Parmigiano | 6  |

#### **Butter**

|           |   |
|-----------|---|
| Olive oil | 6 |
|-----------|---|

#### **Risotto with fish**

|                   |    |
|-------------------|----|
| Rice              | 70 |
| Blue shark        | 30 |
| Tomato sauce      | 50 |
| Grated Parmigiano | 6  |
| Butter            | 5  |

#### **Soup pasta with legumes**

|                  |     |
|------------------|-----|
| Semolina pasta   | 40  |
| Beans (borlotti) | 40  |
| Potatoes         | 100 |
| Olive oil        | 6   |

#### **Pork escalope**

|             |     |
|-------------|-----|
| Pork loin   | 120 |
| Wheat flour | 10  |
| Olive oil   | 6   |

#### **Potato pie**

|                   |     |
|-------------------|-----|
| Potatoes          | 180 |
| Pecorino Romano   | 90  |
| Grated Parmigiano | 15  |
| Eggs              | 60  |

#### **Raw/backed ham**

|                |    |
|----------------|----|
| Raw/backed ham | 80 |
|----------------|----|

#### **Raw ham with melon**

|         |     |
|---------|-----|
| Melon   | 300 |
| Raw ham | 80  |

#### **Ripened cheese (one of this)**

|                     |    |
|---------------------|----|
| Pecorino Romano     | 80 |
| Pecorino Sardo      | 80 |
| Parmigiano Reggiano | 70 |

#### **Roasted turkey**

|           |     |
|-----------|-----|
| Turkey    | 120 |
| Olive oil | 6   |

#### **Squid and potatoes salad**

|           |     |
|-----------|-----|
| Squid     | 100 |
| Tomatoes  | 30  |
| Carrots   | 30  |
| Potatoes  | 30  |
| Olive oil | 6   |

#### **Tuna**

|      |     |
|------|-----|
| Tuna | 100 |
|------|-----|

#### **Tuna, beans, potatoes and onion**

|                  |    |
|------------------|----|
| Tuna             | 90 |
| Beans (borlotti) | 35 |
| Potatoes         | 50 |
| Onion            | 20 |
| Olive oil        | 6  |

#### **Turkey escalope**

|               |     |
|---------------|-----|
| Turkey breast | 120 |
| Wheat flour   | 10  |
| Olive oil     | 6   |

#### **Turkey stripes**

|             |     |
|-------------|-----|
| Turkey      | 120 |
| Garlic      | 5   |
| Wheat flour | 10  |
| Olive oil   | 6   |

**Spaghetti with garlic and oil**

|                |    |
|----------------|----|
| Semolina pasta | 80 |
| Olive oil      | 10 |
| Garlic         | 5  |

**Spaghetti with olives**

|                |    |
|----------------|----|
| Semolina pasta | 80 |
| Tomato sauce   | 70 |
| Olives         | 30 |
| Olive oil      | 6  |

**Vegetable soup with pasta**

|                  |     |
|------------------|-----|
| Semolina pasta   | 40  |
| Mixed vegetables | 100 |
| Potatoes         | 100 |
| Olive oil        | 6   |

**Veal escalope**

|             |     |
|-------------|-----|
| Veal        | 120 |
| Wheat flour | 10  |
| Olive oil   | 6   |

**Veal roll with vegetables**

|           |     |
|-----------|-----|
| Veal      | 100 |
| Chard     | 100 |
| Olive oil | 6   |

**Vegetables parmigiana**

|                   |    |
|-------------------|----|
| Aubergines        | 60 |
| Zucchini          | 60 |
| Tomato sauce      | 60 |
| Grated Parmigiano | 6  |
| Olive oil         | 6  |

**Vegetables pie**

|                   |     |
|-------------------|-----|
| Mixed vegetables  | 120 |
| Eggs              | 60  |
| Potatoes          | 180 |
| Pecorino Romano   | 90  |
| Grated Parmigiano | 6   |
| Olive oil         | 6   |



**Figure S1** – Carbon-Footprint/Food Energy (CFE) index graph for the analysed ingredients.

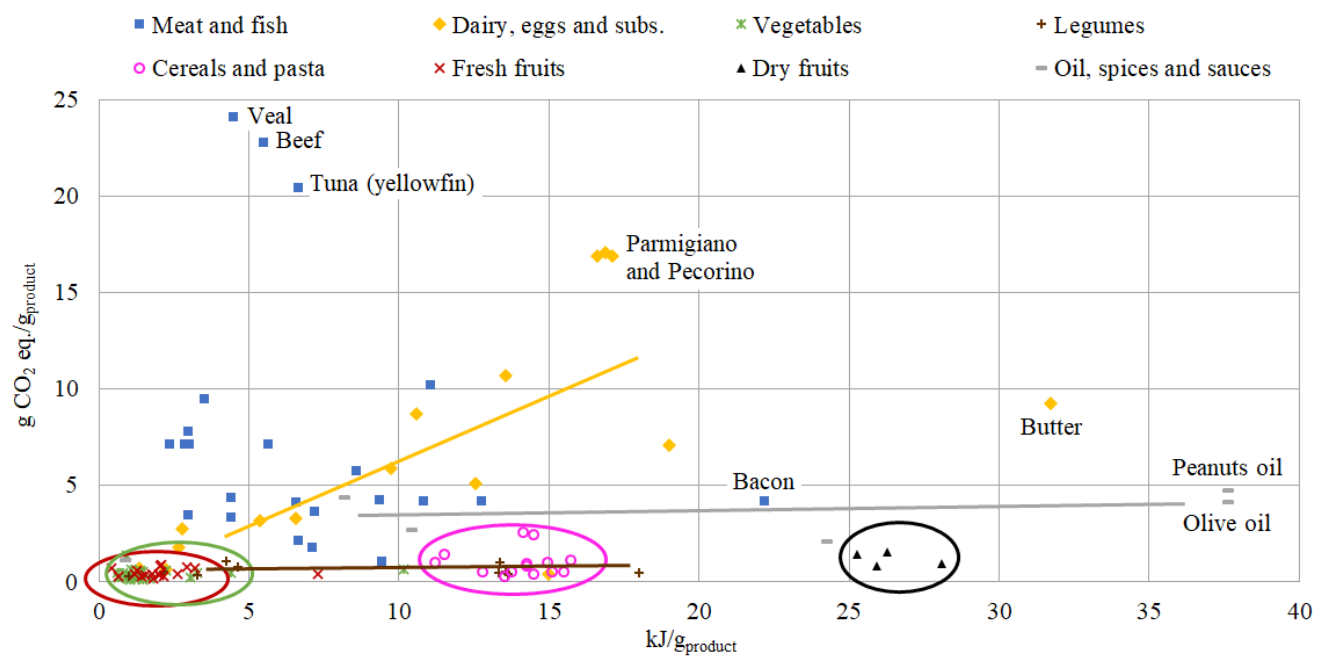

## REFERENCES

- Adewale, C., Higgins, S., Granatstein, D., Stöckle, C.O., Carlson, B.R., Zaher, U.E., Carpenter-Boggs, L., 2016. Identifying hotspots in the carbon footprint of a small scale organic vegetable farm. *Agric. Syst.* 149, 112–121. <https://doi.org/10.1016/j.agsy.2016.09.004>
- Bava, L., Gislon, G., Bacenetti, J., Sandrucci, A., Tamburini, A., Zucali, M., 2017a. Carbon footprint of PDO cheeses: Grana Padano and Gorgonzola, in: 22nd Congress of Animal Science and Production Association. *p. Ital J Anim Sci.* 16, 1.
- Bava, L., Zucali, M., Sandrucci, A., Tamburini, A., 2017b. Environmental impact of the typical heavy pig production in Italy. *J. Clean. Prod.* 140, 685–691. <https://doi.org/10.1016/j.jclepro.2015.11.029>
- Beccali, M., Cellura, M., Iudicello, M., Mistretta, M., 2009. Resource consumption and environmental impacts of the agrofood sector: Life cycle assessment of italian citrus-based products. *Environ. Manage.* 43, 707–724. <https://doi.org/10.1007/s00267-008-9251-y>
- Clune, S., Crossin, E., Verghese, K., 2017. Systematic review of greenhouse gas emissions for different fresh food categories. *J. Clean. Prod.* 140, 766–783. <https://doi.org/10.1016/j.jclepro.2016.04.082>
- CREA, 2019. Consiglio per la Ricerca in agricoltura e l'analisi Economica Agraria. Tabella di composizione degli alimenti [WWW Document]. URL <https://www.crea.gov.it/-/tabella-di-composizione-degli-alimenti> (accessed 12.3.19).
- de Backer, E., Aertsens, J., Vergucht, S., Steurbaut, W., 2009. Assessing the ecological soundness of organic and conventional agriculture by means of life cycle assessment (LCA): A case study of leek production. *Br. Food J.* 111, 1028–1061. <https://doi.org/10.1108/00070700910992916>
- Fusi, A., Guidetti, R., Benedetto, G., 2014. Delving into the environmental aspect of a Sardinian white

wine: From partial to total life cycle assessment. *Sci. Total Environ.* 472, 989–1000.

<https://doi.org/10.1016/j.scitotenv.2013.11.148>

Iribarren, D., Vázquez-Rowe, I., Hospido, A., Moreira, M.T., Feijoo, G., 2011. Updating the carbon footprint of the Galician fishing activity (NW Spain). *Sci. Total Environ.* 409, 1609–1611.

<https://doi.org/10.1016/j.scitotenv.2011.01.007>

Khanali, M., Movahedi, M., Yousefi, M., Jahangiri, S., Khoshnevisan, B., 2016. Investigating energy balance and carbon footprint in saffron cultivation - A case study in Iran. *J. Clean. Prod.* 115, 162–171. <https://doi.org/10.1016/j.jclepro.2015.12.013>

Schmidt, J.H., 2015. Life cycle assessment of five vegetable oils. *J. Clean. Prod.* 87, 130–138.

<https://doi.org/10.1016/j.jclepro.2014.10.011>

The International EPD® System, 2020. EPD Search [WWW Document]. URL

<https://www.environdec.com/EPD-Search/> (accessed 4.14.20).

Vagnoni, E., Franca, A., Porqueddu, C., Duce, P., 2017. Environmental profile of Sardinian sheep milk cheese supply chain: A comparison between two contrasting dairy systems. *J. Clean. Prod.* 165, 1078–1089. <https://doi.org/10.1016/j.jclepro.2017.07.115>
